# Supplementary material for: Taming CL-20 through hydrogen bond interaction with nitromethane
Source: Royal Society of Chemistry journal article supplement (doi:10.1039/d1ce01275d), 2021-01-01
Supplement: d1ce01275d1.pdf [file d1ce01275d1.pdf]

Supporting information

For

## Taming CL-20 through hydrogen bond interaction with nitromethane

### Contents

1 Preparation Of Cocrystal

2 Powder X-ray Diffraction

3 Single Crystal X-ray Diffraction

4 Differential Scanning Calorimetry

5 Calculation Methods

#### 1 Preparation Of Cocrystal

Use a pipette to accurately pipette 2.0 mL of nitromethane solution into a 10 mL vial, accurately weigh 400.0 mg  $\epsilon$ -CL-20 on an analytical balance and add it to the above solution, stir 2h at room temperature, and wait until all is dissolved , At 10 °C, through the solvent slow volatilization method, the transparent block crystals are precipitated.

#### 2 Powder X-ray Diffraction

PXRD patterns were obtained by Bruker D2 Advance with a Cu K $\alpha$  radiation at 40kv-45mA, The sample was scanned within the scan range of 2 $\theta$  from 5° to 50° continuous scan with a step size of 0.015° and a scan speed of 0.2 s per step

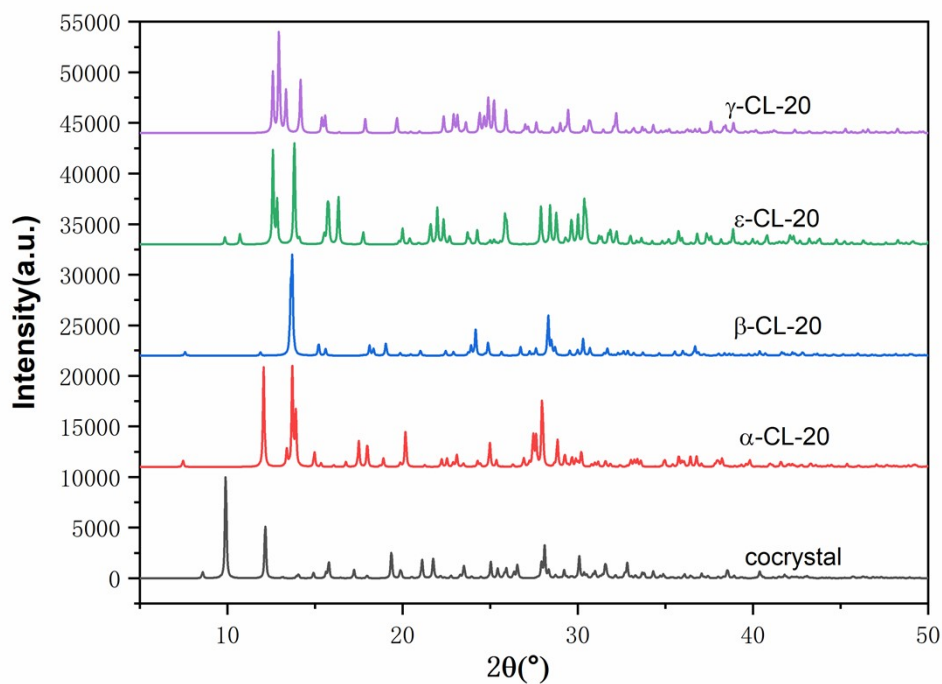

Fig S1 P-XRD patterns of cocystal and  $\epsilon$ -CL-20,  $\beta$ -CL-20 and  $\gamma$ -CL-20

### 3 Single Crystal X-ray Diffraction

Single crystal X-ray diffraction data for cocystal 1 and 2 were collected using a Rigaku AFC10K Saturn. Single crystal of suitable quality was chosen and purged with a cooled nitrogen gas stream at 170 K throughout the data collection. X-ray reflections were collected on a Xcalibur Eos CCD detector with graphite-monochromated Gu-K $\alpha$  radiation ( $\lambda=1.34139$  Å). Data were collected and processed using Olex-2 software. Structure was solved by direct methods and SHELX was used for structure solution and least-squares refinement. The non-hydrogen atoms were refined anisotropically and hydrogen atoms were refined using the riding model. The solvent-masking routine in Olex-2 [equivalent to SQUEEZE in PLATON] was used to remove the contributions of unspecified disordered components from the structure factor list in the CIF

Table 1 Crystallographic Data for cocystal

---

| <b>cocrystal</b>                   |                                                                |
|------------------------------------|----------------------------------------------------------------|
| Empirical formula                  | C <sub>8</sub> H <sub>12</sub> N <sub>14</sub> O <sub>16</sub> |
| Formula weight                     | 560.32                                                         |
| Temperature/K                      | 153.15                                                         |
| Crystal system                     | monoclinic                                                     |
| Space group                        | P2 <sub>1</sub> /c                                             |
| a/Å                                | 8.9053(18)                                                     |
| b/Å                                | 12.585(3)                                                      |
| c/Å                                | 17.847(4)                                                      |
| α/°                                | 90                                                             |
| β/°                                | 90.73(3)                                                       |
| γ/°                                | 90                                                             |
| Volume/Å <sup>3</sup>              | 1999.9(7)                                                      |
| Z                                  | 4                                                              |
| ρ <sub>calc</sub> /cm <sup>3</sup> | 1.861                                                          |
| μ/mm <sup>-1</sup>                 | 0.179                                                          |
| F(000)                             | 1144                                                           |
| Crystal size/mm <sup>3</sup>       | 0.23 × 0.21 × 0.18                                             |
| Radiation                          | MoKα (λ = 0.71073)                                             |

---

---

2 $\theta$  range for data collection/°

3.96 to 54.974

Index ranges

-11 ≤ h ≤ 11, -15 ≤ k ≤ 16, -23 ≤ l ≤ 23

Reflections collected

13110

Independent reflections

4547 [R<sub>int</sub> = 0.0303, R<sub>sigma</sub> = 0.0285]

Final R indexes [I ≥ 2σ (I)]

R<sub>1</sub> = 0.0458, wR<sub>2</sub> = 0.1482

Final R indexes [all data]

R<sub>1</sub> = 0.0564, wR<sub>2</sub> = 0.1848

---

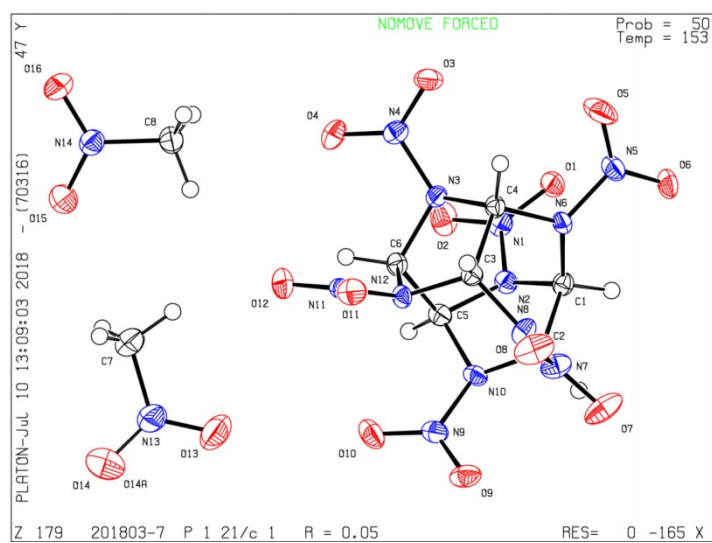

Fig S2 ORTEP diagram for cocrystal 1 with 50% probability ellipsoids(153K)

Table 2 Non-bonding force of cocrystal

---

| D-H...A     | Bond length | D-H...A     | Bond length |
|-------------|-------------|-------------|-------------|
| C1-H1...O15 | 2.442       | C2-H2...O15 | 2.774       |

---

|              |       |             |       |
|--------------|-------|-------------|-------|
| C8-H8C...O4  | 2.49  | C2-H2...N14 | 2.859 |
| C7-H7A...O12 | 2.635 | C8-H8C...N4 | 2.901 |
| C8-H8C...O4  | 2.677 | C5-H5...O6  | 2.904 |
| C7-H7C...O6  | 2.693 | C8-H8C...O3 | 2.936 |

## 4 Differential Scanning Calorimetry

Thermal analyses of all samples were performed on a TA Q100 differential scanning calorimetry. Test samples were placed into aluminum pans and scanned at a heating rate of 10 °C min<sup>-1</sup> with a stream of flowing nitrogen at 50 mL min<sup>-1</sup>

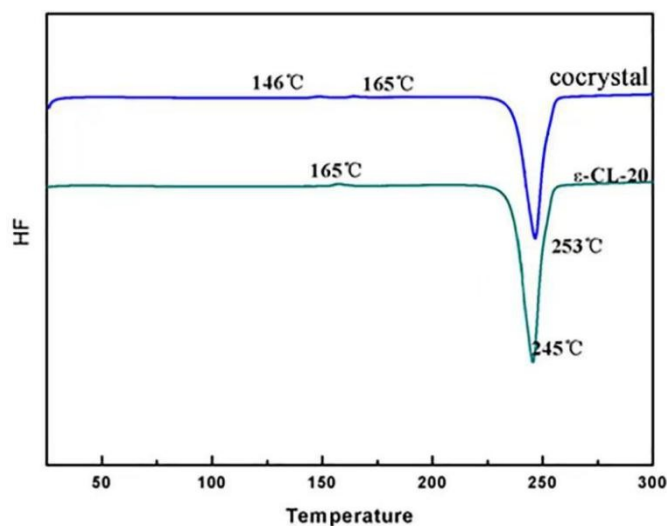

Fig S3 DSC traces of cocystal 1 and  $\epsilon$ -CL-20

## 5 Calculation Methods

Packing coefficients (PC) was calculated by using the equation (1), where  $V_m$  and  $V_c$  are the molecular and crystal volumes, respectively. A volume enclosed through a surface with an assigned electronic density was considered as  $V_m$ . In this work, the electronic density was calculated at the theory level of B3LYP/6-311+G(d,p), and the density of 0.003 au was adopted for  $V_m$  calculations.

$$PC = \sum V_{mol} V_{cell}^{-1} \quad (1)$$

The detonation properties including detonation velocities and detonation pressures for the cocrystal 1 and their respective components were calculated by using EXPLO5 (v6.01). The calculations were carried out using Gaussian 09 (Revision D.01) suite of programs. The gaseous enthalpies of formation of the cocrystals were calculated on the basis of a Born-Haber energy cycle

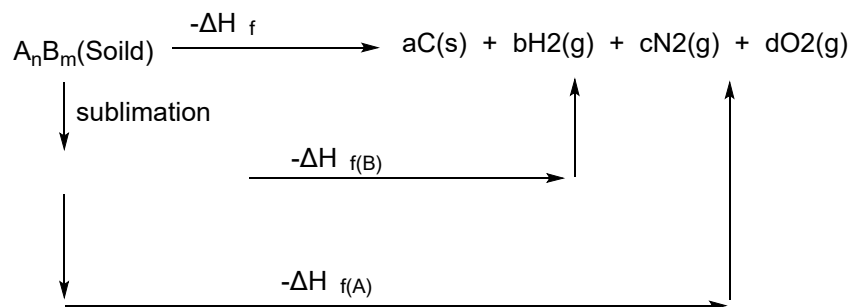

The number is simplified by equation 3:

$$\Delta H_f(\text{cocrystal}, 298K) = \Delta H_f(A, 298K) + \Delta H_f(B, 298K) - \Delta H_{\text{sub}}$$

The sublimation enthalpy of the cocrystal was obtained by the lattice energy of the cocrystal. The lattice energy of the cocrystal was calculated at the PBE/DNP level with Grimme dispersion correction in Dmol3.

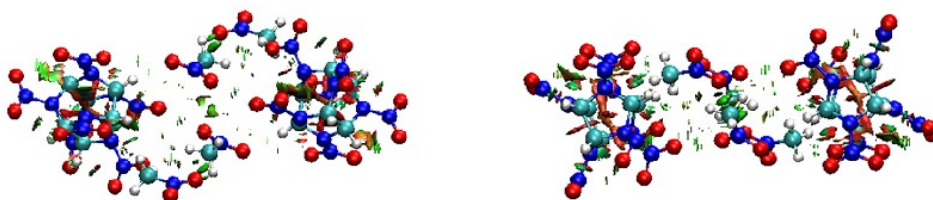

Fig S4 Noncovalent interaction of cocrystal
